# Supplementary material for: Templated synthesis of nitrogen-doped graphene-like carbon materials using spent montmorillonite
Source: Royal Society of Chemistry journal article supplement (doi:10.1039/c4ra13732a), 2014-12-19

# Supplementary Information

## Templated Synthesis of Nitrogen-doped Graphene-like Carbon

### Materials using Spent Montmorillonite

Runliang Zhu<sup>1\*</sup>, Qingze Chen<sup>1,2</sup>, Xin Wang<sup>3</sup>, Shuangyin Wang<sup>3</sup>, Jianxi Zhu<sup>1</sup>, Hongping He<sup>1</sup>

1. *CAS Key Laboratory of Mineralogy and Metallogeny, Guangdong Provincial Key Laboratory of Mineral Physics and Material Research & Development, Guangzhou Institute of Geochemistry, Chinese Academy of Sciences, Guangzhou 510640, China*
2. *University of Chinese Academy of Sciences, Beijing 100049, China*
3. *State Key Laboratory of Chem/Bio-Sensing and Chemometrics, College of Chemistry & Chemical Engineering, Hunan University, Changsha 410082, China*

Figure S1 N<sub>2</sub> adsorption-desorption isotherm of C600-Mt (a), C700-Mt (b) and C800-Mt (c).

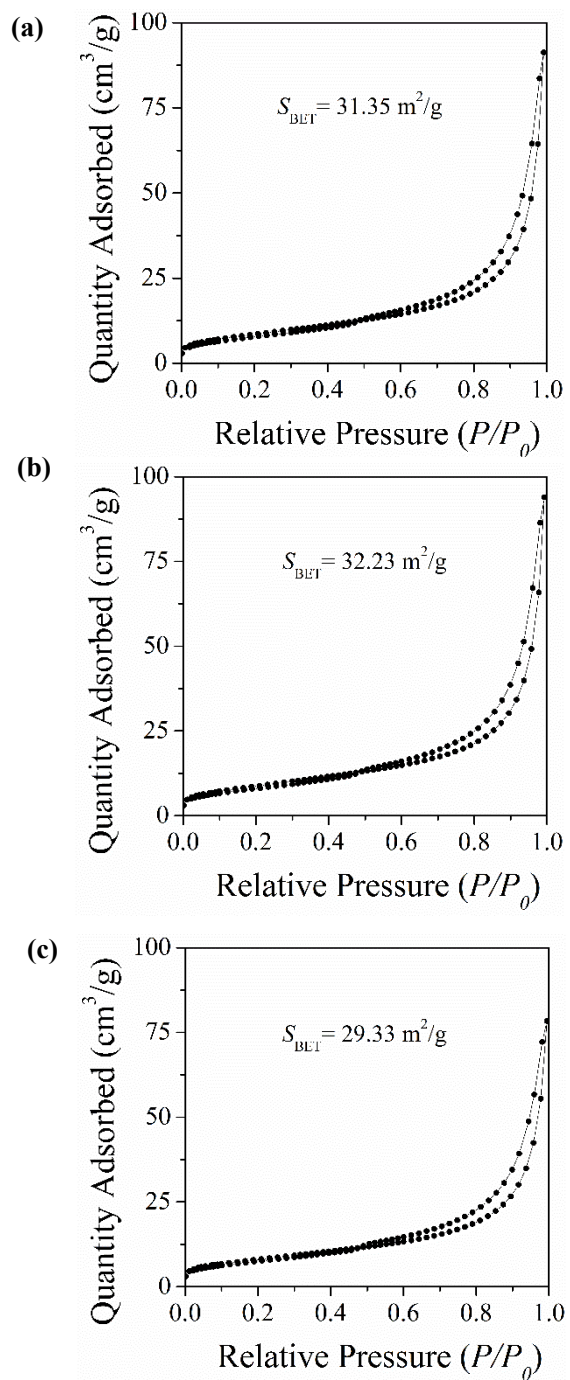

Supplement: c4ra13732a1.pdf [file c4ra13732a1.pdf]
